# Supplementary material for: Estimating survival parameters under conditionally independent left truncation
Source: PubMed Central journal article supplement (PMC9545094; doi:10.1002/pst.2202), 2022-03-09
Supplement: PST-21-895-s001.pdf [file PST-21-895-s001.pdf]

# Estimating survival parameters under conditionally independent left truncation

Arjun Sondhi  
Flatiron Health

## Supplement

In this appendix, we sketch a proof of consistency for the weighted and risk set adjusted Kaplan-Meier estimator, given appropriate density ratio weights. Recall that we define  $T$  as the survival time,  $C$  as the censoring time, and  $E$  as the entry time. We observe  $Y = \min(T, C)$  conditional on  $Y > E$ , with  $\delta = I(T \leq C)$  as the event indicator. The observed event times are  $x_j, j = 1, \dots, m$ .  $Z$  is a vector of confounders such that  $Y \perp E|Z$

We begin by deriving the product form of the survival probability, given independently right-censored data.

$$\begin{aligned} P(T \geq x_k) &= \prod_{j=0}^{k-1} S(x_{j+1}) \\ &= \prod_{j=0}^{k-1} P(T \geq x_{j+1} | T \geq x_j) \\ &= \prod_{j=0}^{k-1} [1 - P(T < x_{j+1} | T \geq x_j)] \\ &= \prod_{j=0}^{k-1} [1 - P(T \in [x_j, x_{j+1}) | T \geq x_j)] \\ &= \prod_{j=0}^{k-1} [1 - P(T = x_j | T \geq x_j)] \\ &= \prod_{j=0}^{k-1} [1 - P(Y = x_j, \delta = 1 | Y \geq x_j)] \\ &= \prod_{j=0}^{k-1} [1 - F(x_j)] \end{aligned}$$

Then, the weighted and risk set adjusted Kaplan-Meier estimator for each term in this expression is given by

$$\hat{F}(x_j) = \frac{\sum_{i=1}^n I(E_i \leq x_j, Y_i = x_j) \delta_i w_i}{\sum_{i=1}^n I(E_i \leq x_j \leq Y_i) w_i},$$

where  $w_i$  is a weight for subject  $i$ . Specifically,

$$w_i = \frac{\pi(z_i)}{\pi(z_i | y_i > e_i)},$$

the density ratio comparing the covariate distributions of the non-truncated and left truncated datasets.

To show consistency, we compute the expectations of the numerator and the denominator. First the

expectation of the numerator is:

$$\begin{aligned}
& \mathbb{E} \left[ \sum_{i=1}^n I(E_i \leq x_j, Y_i = x_j) \delta_i w_i | Y_i > E_i \right] \\
&= \sum_{i=1}^n \mathbb{E}[I(E_i \leq x_j, Y_i = x_j) \delta_i w_i | Y_i > E_i] \\
&= \sum_{i=1}^n \int I(E_i \leq x_j, Y_i = x_j) \delta_i w_i \pi(y_i, e_i, z_i | y_i > e_i) d(y, e, z) \\
&= \sum_{i=1}^n \int I(E_i \leq x_j, Y_i = x_j) \delta_i w_i \pi(y_i, e_i | z_i, y_i > e_i) \pi(z_i | y_i > e_i) d(y, e, z) \\
&= \sum_{i=1}^n \int I(E_i \leq x_j, Y_i = x_j) \delta_i w_i \pi(y_i | z_i, y_i > e_i) \pi(e_i | z_i, y_i > e_i) \pi(z_i | y_i > e_i) d(y, e, z) \\
&= \sum_{i=1}^n \int I(E_i \leq x_j, Y_i = x_j) \delta_i w_i \pi(z_i | y_i > e_i) \pi(y_i | z_i) \pi(e_i | z_i) d(y, e, z) \\
&= \sum_{i=1}^n \int I(E_i \leq x_j, Y_i = x_j) \delta_i \pi(z_i) \pi(y_i | z_i) \pi(e_i | z_i) d(y, e, z) \\
&= \sum_{i=1}^n \int I(E_i \leq x_j, Y_i = x_j) \delta_i \pi(y_i, e_i, z_i) d(y, e, z) \\
&= \sum_{i=1}^n \mathbb{E}[I(E_i \leq x_j, Y_i = x_j) \delta_i] \\
&= \sum_{i=1}^n \mathbb{E}(\mathbb{E}[I(E_i \leq x_j, Y_i = x_j) \delta_i | Z]) \\
&= \sum_{i=1}^n \mathbb{E}(\mathbb{E}[I(E_i \leq x_j) I(Y_i = x_j) \delta_i | Z]) \\
&= \sum_{i=1}^n \mathbb{E}[I(E_i \leq x_j) I(Y_i = x_j) \delta_i] \\
&= \sum_{i=1}^n P(E_i \leq x_j) P(Y_i = x_j, \delta_i = 1) \\
&= nP(E \leq x_j) P(Y = x_j, \delta = 1)
\end{aligned}$$

Similarly, for the denominator, we can obtain:

$$\begin{aligned}
& \mathbb{E} \left[ \sum_{i=1}^n I(E_i \leq x_j \leq Y_i) w_i | Y_i > E_i \right] \\
&= \sum_{i=1}^n \mathbb{E}[I(E_i \leq x_j \leq Y_i)] \\
&= \sum_{i=1}^n \mathbb{E}(\mathbb{E}[I(E_i \leq x_j \leq Y_i) | Z]) \\
&= \sum_{i=1}^n \mathbb{E}(\mathbb{E}[I(E_i \leq x_j) I(Y_i \geq x_j) | Z]) \\
&= \sum_{i=1}^n \mathbb{E}[I(E_i \leq x_j) I(Y_i \geq x_j)] \\
&= nP(E_i \leq x_j) P(Y_i \geq x_j)
\end{aligned}$$

Therefore, by applying the continuous mapping theorem:

$$\hat{F}(x_j) \longrightarrow \frac{nP(E \leq x_j)P(Y = x_j, \delta = 1)}{nP(E \leq x_j)P(Y \geq x_j)} = P(Y = x_j, \delta = 1 | Y \geq x_j),$$

as required.
